# Supplementary material for: Alzheimer’s disease AdvaxCpG- adjuvanted MultiTEP-based dual and single vaccines induce high-titer antibodies against various forms of tau and Aβ pathological molecules
Source: PubMed Central journal article supplement (PMC4929459; doi:10.1038/srep28912), 2016-07-01
Supplement: srep28912-s1.pdf [file srep28912-s1.pdf]

## **Supplementary Information**

**Alzheimer's disease Advax<sup>CpG</sup>- adjuvanted MultiTEP-based dual and single vaccines induce high-titer antibodies against tau and A $\beta$**

Hayk Davtyan, Karen Zagorski, Harinda Rajapaksha, Armine Hovakimyan, Arpine Davtyan,  
Irina Petrushina, Konstantin Kazarian, David H. Cribbs, Nikolai Petrovsky, Michael G.  
Agadjanyan, Anahit Ghochikyan

Figure S1

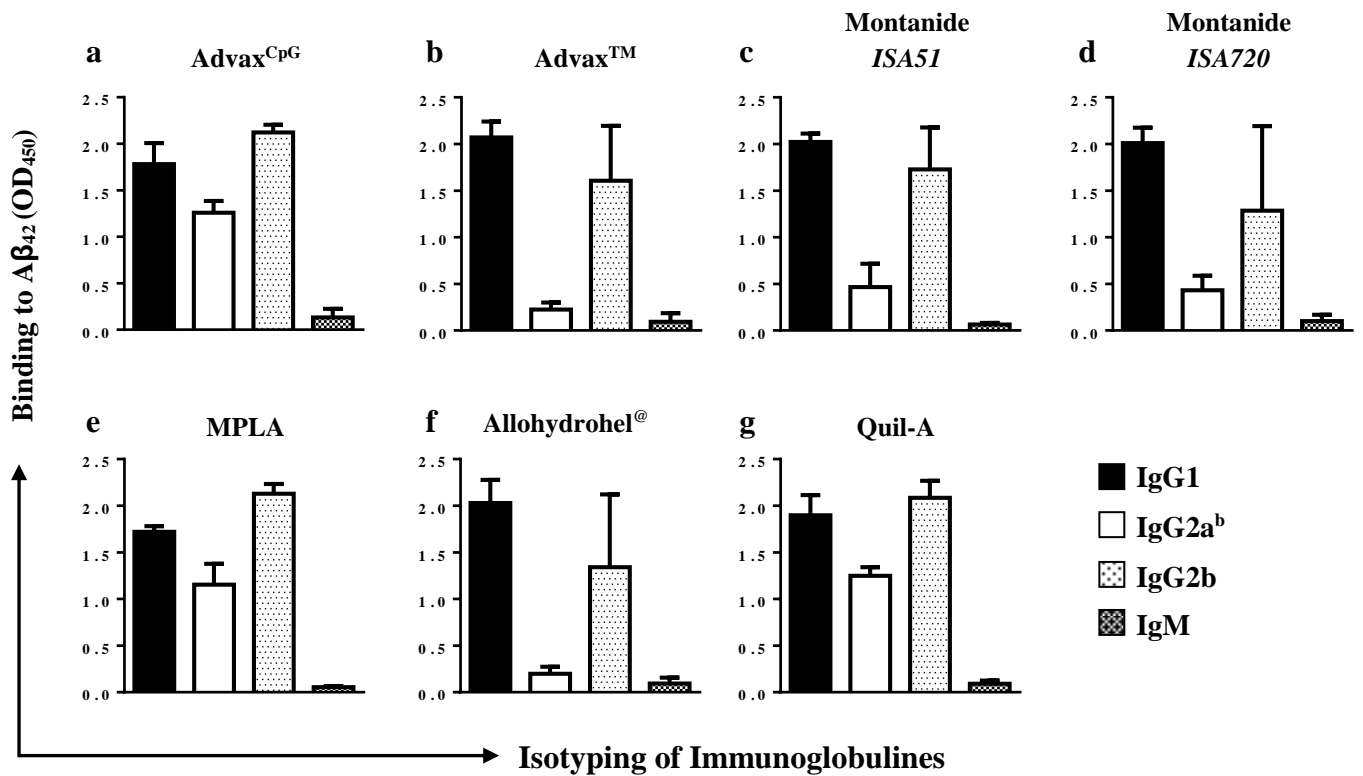

**Anti-A $\beta$  IgG1, IgG2a<sup>b</sup>, IgG2b and IgM antibody responses in mice immunized with AV-1959R formulated with different adjuvants.** To normalize ELISA protocol sera from mice were used at different dilutions in each group.

(a) AV-1959R+Advax<sup>CpG</sup> (dilution 1:1000); (b) AV-1959R+Advax<sup>TM</sup> (dilution 1:200); (c) AV-1959R+Montanide-ISA51 (dilution 1:500); (d) AV-1959R+Montanide-ISA720 (dilution 1:200); (e) AV-1959R+MPLA (dilution 1:500); (f) AV-1959R+Allohydrohel<sup>®</sup> (dilution 1:50); and (g) AV-1959R+Quil-A (dilution 1:500). Bars represent average  $\pm$  SD (n=5 per group).

**Figure S2**

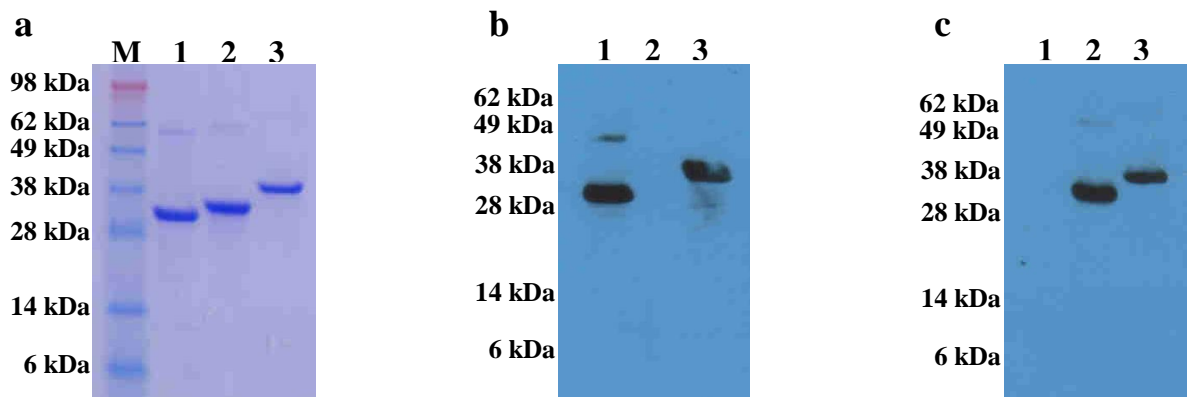

**Generation and characterization of recombinant proteins: AV-1959R, AV-1980R and AV-1953R.** (a) The purity and integrity of all three proteins isolated from *E.coli* was analyzed in a 10% Bis-Tris polyacrylamide gel in MES buffer after visualization by Coomassie dye. The molecular weights of protein bands are corresponded to the theoretically calculated molecular weights (M-Molecular weight marker; Lane 1 - AV-1959R [32.3 kDa], Lane 2 – AV-1980R [33.8 kDa], Lane 3 – AV-1953R [38.0 kDa]). As expected dual vaccine AV-1953R containing both A $\beta$  and tau B cell epitopes is heavier than each single vaccine (AV-1959R and AV-1980R), containing either A $\beta$  or tau B cell epitope. In all vaccines B cell epitopes are attached to the same MultiTEP platform. (b, c) The specificity of the bands was confirmed by WB using 6E10 (anti-A $\beta$ ; b) and 1C9 (anti-Tau; c) monoclonal antibodies followed by HRP conjugated anti-mouse IgG (Lane 1 - AV-1959R, Lane 2 – AV-1980R, Lane 3 – AV-1953R).

**Table S1. Templates used for AV-1959R**

| PDB ID | Reference |
|--------|-----------|
| 2NYYA  | 3         |
| 3J2VC  | 4         |
| 1QGTA  | 5         |
| 1F31A  | 6         |
| 2G33C  | 8         |
| 3RSJA  | 7         |
| 3KXSF  | 11        |

**Table S2. Templates used for AV-1980R**

| PDB ID | Reference |
|--------|-----------|
| 1G55A  | 1         |
| 2VU9A  | 2         |
| 2NYYA  | 3         |
| 3J2VC  | 4         |
| 1F31A  | 6         |
| 1QGTA  | 5         |
| 3RSJA  | 7         |
| 3KXSF  | 11        |

**Table S3. Templates used for AV-1953R**

| PDB ID | Reference |
|--------|-----------|
| 2NYYA  | 3         |
| 3J2VC  | 4         |
| 1QGTA  | 5         |
| 3RSJA  | 7         |
| 2G33C  | 8         |
| 1UTEA  | 9         |
| 3FFZA  | 10        |
| 1K6WA  | 12        |
| 3V6ZE  | 13        |

### References for Supplementary Material

- 1 Dong, A. *et al.* Structure of human DNMT2, an enigmatic DNA methyltransferase homolog that displays denaturant-resistant binding to DNA. *Nucleic Acids Res* **29**, 439-448 (2001).
- 2 Stenmark, P., Dupuy, J., Imamura, A., Kiso, M. & Stevens, R. C. Crystal structure of botulinum neurotoxin type A in complex with the cell surface co-receptor GT1b-insight into the toxin-neuron interaction. *PLoS Pathog* **4**, e1000129 (2008).
- 3 Garcia-Rodriguez, C. *et al.* Molecular evolution of antibody cross-reactivity for two subtypes of type A botulinum neurotoxin. *Nat Biotechnol* **25**, 107-116 (2007).
- 4 Yu, X., Jin, L., Jih, J., Shih, C. & Zhou, Z. H. 3.5A cryoEM structure of hepatitis B virus core assembled from full-length core protein. *PLoS One* **8**, e69729 (2013).
- 5 Wynne, S. A., Crowther, R. A. & Leslie, A. G. The crystal structure of the human hepatitis B virus capsid. *Mol Cell* **3**, 771-780 (1999).
- 6 Swaminathan, S. & Eswaramoorthy, S. Structural analysis of the catalytic and binding sites of Clostridium botulinum neurotoxin B. *Nat Struct Biol* **7**, 693-699 (2000).
- 7 Benson, M. A., Fu, Z., Kim, J. J. & Baldwin, M. R. Unique ganglioside recognition strategies for clostridial neurotoxins. *J Biol Chem* **286**, 34015-34022 (2011).
- 8 Bourne, C. R., Finn, M. G. & Zlotnick, A. Global structural changes in hepatitis B virus capsids induced by the assembly effector HAP1. *J Virol* **80**, 11055-11061 (2006).
- 9 Guddat, L. W. *et al.* Crystal structure of mammalian purple acid phosphatase. *Structure* **7**, 757-767 (1999).
- 10 Kumaran, D. *et al.* Domain organization in Clostridium botulinum neurotoxin type E is unique: its implication in faster translocation. *J Mol Biol* **386**, 233-245 (2009).
- 11 Packianathan, C., Katen, S. P., Dann, C. E., 3rd & Zlotnick, A. Conformational changes in the hepatitis B virus core protein are consistent with a role for allostery in virus assembly. *J Virol* **84**, 1607-1615 (2010).

- 12 Ireton, G. C., McDermott, G., Black, M. E. & Stoddard, B. L. The structure of Escherichia coli cytosine deaminase. *J Mol Biol* **315**, 687-697 (2002).
- 13 DiMattia, M. A. *et al.* Antigenic switching of hepatitis B virus by alternative dimerization of the capsid protein. *Structure* **21**, 133-142 (2013).
